# Supplementary material for: Rapid neural representations of personally relevant faces
Source: bioRxiv or medRxiv preprint supplement (doi:10.1101/585133), 2021-04-13
Supplement: Supplementary file [file media-1.pdf]

## Supplementary Figures

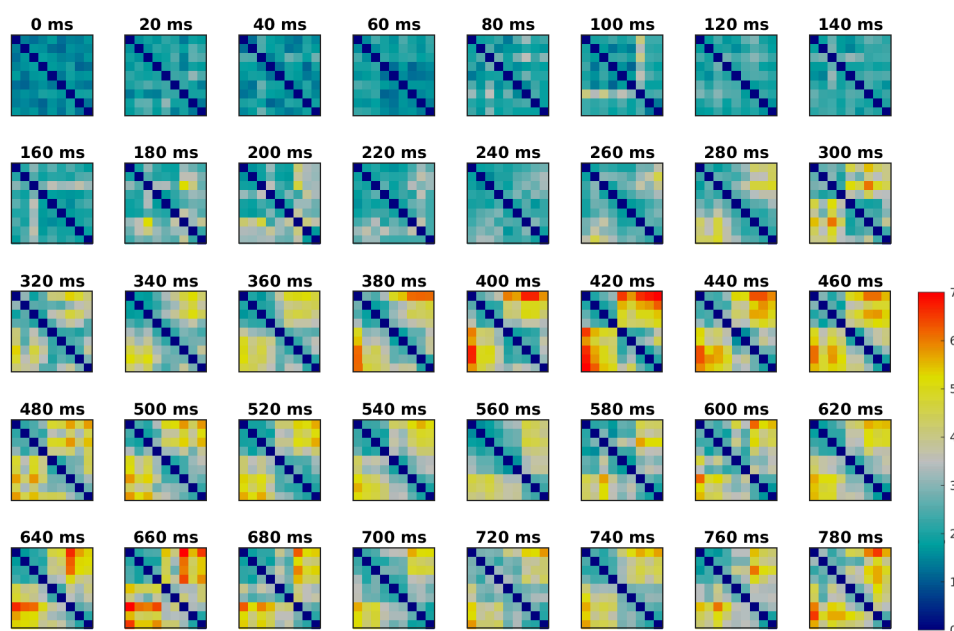

**Figure S1 – Time course of EEG RDMs.** EEG RDMs from stimulus onset to 780 ms after stimulus onset, in steps of 20 ms. For the order of experimental conditions, see Figure 1.

## Supplementary Tables

| Condition                     | Brain regions                                                              | Local maxima (mm) |     |     | Cluster size (voxels) |
|-------------------------------|----------------------------------------------------------------------------|-------------------|-----|-----|-----------------------|
|                               |                                                                            | x                 | y   | z   |                       |
| <b>fMRI Standard Analyses</b> |                                                                            |                   |     |     |                       |
| BF > STR                      | Fusiform cortex, lateral occipital cortex                                  | 46                | -60 | -22 | 1884                  |
|                               | Precuneus cortex, posterior cingulate gyrus                                | -4                | -58 | 30  | 1235                  |
|                               | Anterior cingulate cortex, frontal pole, paracingulate gyrus               | 0                 | 40  | 10  | 495                   |
|                               | R middle temporal gyrus, inferior temporal gyrus, superior temporal sulcus | 50                | -44 | 6   | 201                   |
|                               | R frontal orbitofrontal cortex                                             | 26                | 12  | -16 | 96                    |
|                               | L frontal orbitofrontal cortex                                             | -28               | 18  | -16 | 29                    |
|                               | R Inferior frontal gyrus                                                   | 50                | 34  | 8   | 25                    |
|                               | R temporal pole                                                            | 44                | 18  | -16 | 16                    |
| FR > STR                      | Precuneus cortex, posterior cingulate cortex, intracalcarine cortex        | -2                | -60 | 32  | 2808                  |

|                 |                                                                                                                                |     |     |     |      |
|-----------------|--------------------------------------------------------------------------------------------------------------------------------|-----|-----|-----|------|
|                 | Ventromedial prefrontal cortex, frontal pole, anterior cingulate cortex, paracingulate gyrus, medial superior frontal gyrus    | 2   | 50  | -20 | 1571 |
|                 | R fusiform gyrus, lateral occipital cortex                                                                                     | 44  | -60 | -22 | 1405 |
|                 | R supramarginal gyrus, middle temporal gyrus, superior temporal sulcus                                                         | 50  | -42 | 10  | 98   |
|                 | Subcallosal cortex                                                                                                             | -4  | 20  | -6  | 87   |
|                 | L lateral occipital cortex                                                                                                     | -40 | -92 | 14  | 20   |
|                 | L lateral occipital cortex                                                                                                     | -30 | -88 | 20  | 8    |
|                 | L supramarginal gyrus, angular gyrus                                                                                           | -60 | -48 | 12  | 4    |
|                 | R anterior middle temporal gyrus                                                                                               | 56  | 4   | -32 | 3    |
| Happy > neutral | Lingual gyrus, intracalcarine gyrus, precuneous cortex                                                                         | -18 | -50 | -14 | 3092 |
|                 | L Temporal pole, orbitofrontal cortex, insular cortex, frontal operculum, inferior frontal gyrus, caudate, thalamus, pallidum, | -34 | 16  | -32 | 1815 |
|                 | Frontal pole, anterior cingulate, paracingulate gyrus, superior frontal gyrus                                                  | -18 | 68  | 18  | 1665 |
|                 | Supplementary motor cortex, medial and L superior frontal gyrus, anterior cingulate cortex, mid cingulate cortex               | 4   | 6   | 66  | 1109 |
|                 | Cerebellum, brain stem                                                                                                         | 14  | -74 | -38 | 1065 |
|                 | L precentral gyrus, postcentral gyrus, middle frontal gyrus,                                                                   | -26 | -16 | 64  | 900  |
|                 | R cerebellum, brain stem                                                                                                       | 32  | -38 | -28 | 424  |
|                 | L cerebellum                                                                                                                   | -22 | -82 | -24 | 413  |
|                 | Cuneal cortex, occipital pole                                                                                                  | -8  | -82 | 32  | 288  |
|                 | Precuneus cortex, posterior cingulate                                                                                          | -6  | -56 | 32  | 254  |
| Happy > fear    | L middle frontal gyrus, inferior frontal gyrus, frontal pole                                                                   | -36 | 42  | 22  | 347  |
|                 | L Angular gyrus, supramarginal gyrus                                                                                           | -40 | -52 | 46  | 169  |
|                 | L frontal operculum, insular cortex,                                                                                           | -38 | 22  | 6   | 129  |
|                 | R insular cortex                                                                                                               | 40  | 18  | 0   | 108  |
|                 | L lateral occipital cortex, superior parietal lobule                                                                           | -28 | -60 | 42  | 82   |
|                 | R precentral gyrus, middle frontal gyrus                                                                                       | 42  | 6   | 30  | 67   |
|                 | L middle frontal gyrus                                                                                                         | -34 | 4   | 62  | 49   |

|                  |                                                                                                                                 |     |      |     |      |
|------------------|---------------------------------------------------------------------------------------------------------------------------------|-----|------|-----|------|
|                  | L superior frontal gyrus                                                                                                        | -20 | 20   | 60  | 44   |
|                  | L thalamus                                                                                                                      | -8  | -14  | 18  | 5    |
|                  | L supplementary motor cortex                                                                                                    | -8  | 6    | 54  | 5    |
| <b>Model RSA</b> |                                                                                                                                 |     |      |     |      |
| Identity         | L Fusiform cortex, lingual gyrus, precuneus cortex, posterior cingulate cortex, lateral occipital cortex, intracalcarine cortex | -28 | -52  | -14 | 3035 |
|                  | Medial superior frontal gyrus, anterior cingulate, paracingulate gyrus, frontal pole                                            | -2  | 36   | 52  | 2721 |
|                  | L inferior frontal gyrus, middle frontal gyrus                                                                                  | -54 | 18   | 10  | 1607 |
|                  | Occipital pole, lingual gyrus, intracalcarine cortex,                                                                           | -12 | -104 | -10 | 1436 |
|                  | R temporal pole, orbitofrontal cortex, frontal operculum, insular cortex, inferior frontal gyrus                                | 40  | 8    | -32 | 966  |
|                  | R postcentral gyrus, precentral gyrus                                                                                           | 52  | -20  | 38  | 842  |
|                  | L angular gyrus, middle temporal gyrus, Superior temporal sulcus, supramarginal gyrus, lateral occipital cortex                 | -50 | -56  | 28  | 565  |
|                  | Mid cingulate gyrus                                                                                                             | 2   | -12  | 36  | 369  |
|                  | Superior frontal gyrus, supplementary motor cortex,                                                                             | 16  | 16   | 64  | 327  |
|                  | L middle temporal gyrus, superior temporal gyrus                                                                                | -64 | -10  | -6  | 308  |
| Emotion          | L inferior frontal gyrus, temporal pole, precentral gyrus                                                                       | -54 | 14   | 2   | 301  |
|                  | Ventromedial prefrontal cortex, subcallosal cortex, frontal pole                                                                | 10  | 30   | -24 | 266  |
|                  | L parahippocampal gyrus, hippocampus                                                                                            | -20 | -4   | -30 | 141  |
|                  | R putamen, caudate                                                                                                              | 22  | 14   | -2  | 122  |
|                  | R amygdala, putamen, pallidum,                                                                                                  | 18  | -6   | -12 | 108  |
|                  | R temporal pole, inferior frontal gyrus                                                                                         | 48  | 12   | -8  | 88   |
|                  | L temporal pole, parahippocampal gyrus                                                                                          | -36 | 10   | -30 | 77   |
|                  | L orbitofrontal cortex, amygdala                                                                                                | -26 | 10   | -20 | 65   |
|                  | R planum temporale, superior temporal gyrus                                                                                     | 46  | 2    | -20 | 63   |
|                  | L insular cortex                                                                                                                | -36 | -6   | -6  | 57   |

|             |                                                                                                                                                                    |     |     |     |      |
|-------------|--------------------------------------------------------------------------------------------------------------------------------------------------------------------|-----|-----|-----|------|
| Love        | L insular cortex, central opercular cortex, putamen, frontal opercular cortex                                                                                      | -32 | 10  | 10  | 355  |
|             | L postcentral gyrus                                                                                                                                                | -66 | -14 | 22  | 117  |
|             | R postcentral gyrus, precentral gyrus                                                                                                                              | 64  | -6  | 30  | 116  |
|             | R cerebellum                                                                                                                                                       | 12  | -86 | -26 | 99   |
|             | L lateral occipital cortex                                                                                                                                         | -48 | -74 | 12  | 86   |
|             | L cerebellum                                                                                                                                                       | -30 | -80 | -32 | 82   |
|             | R superior frontal gyrus                                                                                                                                           | 14  | 14  | 64  | 80   |
|             | L Brainstem, hippocampus                                                                                                                                           | -14 | -20 | -26 | 79   |
|             | R parahippocampal gyrus, temporal fusiform cortex                                                                                                                  | 32  | -8  | -34 | 75   |
|             | Paracingulate gyrus                                                                                                                                                | -2  | 46  | -2  | 73   |
| Familiarity | Intracalcarine cortex, precuneus cortex, posterior cingulate gyrus, cuneal cortex, Lingual gyrus                                                                   | -10 | -72 | 16  | 2974 |
|             | R middle temporal gyrus, supramarginal gyrus, fusiform gyrus, lateral occipital cortex, inferior temporal gyrus, superior Temporal gyrus, superior temporal sulcus | 66  | -42 | 6   | 1772 |
|             | Frontal pole, ventromedial prefrontal cortex, paracingulate gyrus, anterior cingulate gyrus, medial superior frontal gyrus,                                        | -6  | 64  | 0   | 1695 |
|             | R superior frontal gyrus                                                                                                                                           | 10  | 16  | 70  | 274  |
|             | L occipital fusiform cortex, cerebellum                                                                                                                            | -34 | -70 | -14 | 267  |
|             | R lateral occipital cortex                                                                                                                                         | 28  | -60 | 56  | 261  |
|             | L lateral occipital cortex, angular gyrus                                                                                                                          | -60 | -64 | 24  | 258  |
|             | R middle frontal gyrus, precentral gyrus                                                                                                                           | 38  | 4   | 46  | 254  |
|             | L frontal pole, superior frontal gyrus                                                                                                                             | -12 | 42  | 54  | 248  |
|             | R frontal orbital cortex, frontal operculum, insular cortex                                                                                                        | 46  | 26  | -12 | 206  |
| Valence     | Ventromedial cortex, R orbitofrontal cortex, amygdala, hippocampus (bilateral), putamen, caudate                                                                   | 4   | 42  | -14 | 1140 |
|             | L temporal pole, inferior frontal gyrus, anterior middle temporal gyrus                                                                                            | -52 | 10  | 0   | 406  |
|             | Anterior cingulate cortex, paracingulate gyrus, medial superior frontal gyrus                                                                                      | 2   | 6   | 44  | 216  |
|             | R Cerebellum                                                                                                                                                       | 30  | -38 | -36 | 183  |

|          |                                                                                                                                   |     |     |     |      |
|----------|-----------------------------------------------------------------------------------------------------------------------------------|-----|-----|-----|------|
|          | R posterior middle temporal gyrus, inferior temporal gyrus                                                                        | 48  | -12 | -24 | 147  |
|          | L occipital pole                                                                                                                  | -20 | -98 | 12  | 139  |
|          | L superior temporal gyrus                                                                                                         | 54  | -4  | 14  | 135  |
|          | L angular gyrus, superior parietal lobule, lateral occipital cortex                                                               | 38  | -54 | 44  | 129  |
|          | L parahippocampal gyrus, hippocampus                                                                                              | -18 | -16 | -30 | 118  |
|          | R precentral gyrus, posterior cingulate gyrus                                                                                     | 14  | -28 | 48  | 103  |
| EEG-fMRI |                                                                                                                                   |     |     |     |      |
| 108 ms   | Lingual gyrus, intracalcarine cortex, precuneus cortex, cuneal cortex                                                             | -2  | -68 | 2   | 620  |
|          | L planum temporale, middle temporal gyrus, superior temporal gyrus, supramarginal gyrus                                           | -62 | -32 | 12  | 449  |
|          | Precuneus cortex                                                                                                                  | 0   | -62 | 38  | 200  |
|          | L superior parietal lobule, lateral occipital cortex                                                                              | -26 | -58 | 54  | 170  |
|          | R lateral occipital cortex                                                                                                        | 36  | -72 | 54  | 156  |
|          | Posterior cingulate cortex                                                                                                        | -6  | -26 | 34  | 132  |
|          | L middle temporal gyrus                                                                                                           | -58 | -8  | -14 | 125  |
|          | L lateral occipital cortex, angular gyrus, supramarginal gyrus                                                                    | -60 | -62 | 32  | 81   |
|          | Ventromedial cortex, frontal pole                                                                                                 | 2   | 52  | -22 | 79   |
|          | L lateral occipital cortex                                                                                                        | -52 | -68 | 22  | 79   |
| 204 ms   | Lingual gyrus, Precuneus cortex, posterior cingulate cortex                                                                       | 0   | -68 | 2   | 2890 |
|          | R inferior temporal gyrus, lateral occipital cortex, superior temporal sulcus, middle temporal gyrus, fusiform cortex, cerebellum | 48  | -58 | -16 | 2442 |
|          | Ventromedial prefrontal cortex, frontal pole, anterior cingulate cortex                                                           | 0   | 48  | -14 | 1111 |
|          | Medial forebrain, hypothalamus, L amygdala, N. accumbens, BNST                                                                    | -2  | -2  | -12 | 619  |
|          | L middle temporal gyrus, superior temporal gyrus, planum temporale                                                                | -58 | -10 | -10 | 528  |
|          | L lateral occipital cortex, supramarginal gyrus, postcentral gyrus, precentral gyrus                                              | -56 | 64  | 36  | 336  |
|          | R precentral gyrus, middle frontal gyrus                                                                                          | 44  | -6  | 46  | 335  |

|        |                                                                                                                                                                            |     |     |     |      |
|--------|----------------------------------------------------------------------------------------------------------------------------------------------------------------------------|-----|-----|-----|------|
|        | R orbitofrontal cortex, insular cortex, frontal pole                                                                                                                       | 32  | 26  | -18 | 256  |
|        | Posterior cingulate gyrus, precentral gyrus                                                                                                                                | -4  | -38 | 34  | 207  |
|        | Cerebellum, fusiform gyrus                                                                                                                                                 | -14 | -80 | -20 | 203  |
| 308 ms | Precuneous cortex                                                                                                                                                          | 2   | -76 | 42  | 119  |
|        | R superior frontal gyrus                                                                                                                                                   | 10  | 14  | 68  | 59   |
|        | Frontal pole                                                                                                                                                               | -8  | 60  | -8  | 47   |
|        | Precuneous cortex, intracalcarine cortex                                                                                                                                   | -6  | -64 | 18  | 28   |
|        | Posterior cingulate gyrus                                                                                                                                                  | -2  | -44 | 10  | 20   |
|        | R occipital pole                                                                                                                                                           | 16  | -90 | 8   | 19   |
|        | Lingual gyrus                                                                                                                                                              | -4  | -64 | 2   | 14   |
|        | R precuneous cortex                                                                                                                                                        | 16  | -68 | 46  | 7    |
|        | L temporal fusiform gyrus                                                                                                                                                  | -34 | -20 | -30 | 6    |
|        | L postcentral gyrus                                                                                                                                                        | -10 | -40 | 74  | 4    |
| 428 ms | R middle temporal gyrus, angular gyrus                                                                                                                                     | 66  | -28 | -2  | 233  |
|        | Frontal pole                                                                                                                                                               | -4  | 64  | 0   | 228  |
|        | L precentral gyrus, postcentral gyrus                                                                                                                                      | -24 | -26 | 62  | 227  |
|        | R superior frontal gyrus                                                                                                                                                   | 10  | 16  | 68  | 214  |
|        | L central opercular cortex, precentral gyrus, postcentral gyrus, planum polare                                                                                             | -50 | 4   | 6   | 210  |
|        | R angular gyrus, lateral occipital cortex, precuneous cortex                                                                                                               | 40  | -56 | 34  | 184  |
|        | L inferior frontal gyrus, orbitofrontal cortex, frontal operculum                                                                                                          | -54 | 14  | 10  | 180  |
|        | L middle frontal gyrus                                                                                                                                                     | -44 | 6   | 44  | 179  |
|        | R middle frontal gyrus, inferior frontal gyurs                                                                                                                             | 52  | 36  | 28  | 176  |
|        | Precuneus cortex, posterior cingulate cortex                                                                                                                               | -10 | -54 | 46  | 167  |
| 660 ms | Lateral occipital cortex, Intracalcarine cortex, precuneous cortex, cuneal cortex, posterior cingulate cortex, lingual gyrus, middle frontal gyrus, superior frontal gyrus | 54  | -68 | 24  | 5570 |
|        | R superior temporal gyrus, middle temporal gyrus, inferior temporal gyrus, planum temporale, supramarginal gyrus, cerebellum                                               | 60  | -8  | -4  | 1339 |

|                                                                                                         |     |     |     |      |
|---------------------------------------------------------------------------------------------------------|-----|-----|-----|------|
| Frontal pole, paracingulate gyrus, frontal medial cortex, subcallosal cortex, superior frontal gyrus    | -24 | 66  | 10  | 1150 |
| R middle frontal gyrus, frontal pole, inferior frontal gyrus, frontal operculum, frontal orbital cortex | 48  | 34  | 24  | 757  |
| Lingual gyrus, occipital pole                                                                           | 8   | -88 | -14 | 660  |
| Cerebellum, fusiform cortex                                                                             | -36 | -52 | -28 | 386  |
| L postcentral gyrus, precentral gyrus, central operculum                                                | -50 | -6  | 18  | 286  |
| L superior frontal gyrus                                                                                | -14 | 18  | 52  | 284  |
| L precentral gyrus, precentral gyrus,                                                                   | -12 | -34 | 64  | 224  |
| R middle frontal gyrus                                                                                  | 50  | 20  | 38  | 223  |

**Table S1 – Summary of brain activations.** Activations are whole-brain corrected using permutation tests and threshold-free cluster enhancement. Clusters were determined from t-statistics after thresholding with the binarised result of the TFCE. Only the 10 largest clusters per condition are reported. Cluster size reported in 2 x 2 x 2 mm voxels.

| Region     |                                    | Identity                                                                                                                                                                          | Emotion                                   | Identity x Emotion                                                                                                                                                                                                                                                                                                     |
|------------|------------------------------------|-----------------------------------------------------------------------------------------------------------------------------------------------------------------------------------|-------------------------------------------|------------------------------------------------------------------------------------------------------------------------------------------------------------------------------------------------------------------------------------------------------------------------------------------------------------------------|
| L Amygdala | <i>F</i><br><i>p</i><br>$\eta p^2$ | 1.68<br>.202                                                                                                                                                                      | < 1                                       | < 1                                                                                                                                                                                                                                                                                                                    |
| R Amygdala | <i>F</i><br><i>p</i><br>$\eta p^2$ | < 1                                                                                                                                                                               | < 1                                       | < 1                                                                                                                                                                                                                                                                                                                    |
| L VTA      | <i>F</i><br><i>p</i><br>$\eta p^2$ | 5.32<br>.009<br>.202<br>Partner > Stranger<br>$F = 11.04, p = .010, \eta p^2 = .354$<br>Partner vs. Friend<br>$F = 3.60, p = .215$<br>Friend vs. Stranger<br>$F = 1.44, p = .733$ | 2.52<br>.092                              | 3.36<br>.013<br>.138<br>Emotion in Partner<br>$F < 1$<br>Emotion in Friend<br>$F = 5.84, p = .018, \eta p^2 = .218$<br>Happy > Neutral<br>$F = 9.18, p = .019, \eta p^2 = .304$<br>Happy > Fear<br>$F = 7.21, p = .042, \eta p^2 = .256$<br>Fear vs. Neutral<br>$F < 1$<br>Emotion in Stranger<br>$F = 1.07, p = .350$ |
| R VTA      | <i>F</i><br><i>p</i><br>$\eta p^2$ | 4.60<br>.016<br>.180<br>Partner vs. Stranger<br>$F = 6.61, p = .053$<br>Partner vs. Friend<br>$F = 5.74, p = .078$<br>Friend vs. Stranger<br>$F < 1$                              | 2.53<br>.092                              | < 1                                                                                                                                                                                                                                                                                                                    |
| L Caudate  | <i>F</i><br><i>p</i><br>$\eta p^2$ | < 1                                                                                                                                                                               | 4.04<br>.025<br>.161<br>Happy vs. Neutral | < 1                                                                                                                                                                                                                                                                                                                    |

|           |                          |              |                                                                                                                                                         |              |
|-----------|--------------------------|--------------|---------------------------------------------------------------------------------------------------------------------------------------------------------|--------------|
|           |                          |              | $F = 6.12, p = .066$<br>Happy vs. Fear<br>$F = 6.32, p = .060$<br>Fear vs. Neutral<br>$F < 1$                                                           |              |
| R Caudate | $F$<br>$p$<br>$\eta p^2$ | < 1          | 4.06<br>.025<br>.162<br>Happy vs. Neutral<br>$F = 3.72, p = .202$<br>Happy vs. Fear<br>$F = 6.24, p = .062$<br>Fear vs. Neutral<br>$F = 1.28, p = .812$ | 1.41<br>.239 |
| L Putamen | $F$<br>$p$<br>$\eta p^2$ | 2.57<br>.094 | 2.86<br>.070                                                                                                                                            | < 1          |
| R Putamen | $F$<br>$p$<br>$\eta p^2$ | < 1          | 2.74<br>.076                                                                                                                                            | < 1          |
| L N. acc. | $F$<br>$p$<br>$\eta p^2$ | 1.66<br>.202 | 1                                                                                                                                                       | 1            |
| R N. acc. | $F$<br>$p$<br>$\eta p^2$ | 1.29<br>.286 | 1.46<br>.243                                                                                                                                            | < 1          |

**Table S2 – Region of Interest Analyses unimodal fMRI.** Results of repeated-measures ANOVAs with factors Emotion (Fear Happy Neutral) and Identity (Partner Stranger Friend). Huyn-Feldt-corrections were applied to correct for violations of sphericity assumptions. In post-tests, p-values are Bonferroni-corrected. Degrees of freedom: (2,42) for main effects of Identity and Emotion; (1,21) for post-tests. Interactions: F(4,84), post-tests of Emotion within Identity (2,42). R=right; L=left; VTA=ventral tegmental area; N. acc. = Nucleus accumbens.

| ERP Component |                          | Identity                                                                                                                                                                                         | Emotion | Identity x Emotion |
|---------------|--------------------------|--------------------------------------------------------------------------------------------------------------------------------------------------------------------------------------------------|---------|--------------------|
| P1            | $F$<br>$p$<br>$\eta p^2$ | 4.10<br>.025<br>.194<br>Partner > Stranger<br>$F = 10.10, p = .017, \eta p^2 = .373$<br>Partner vs. Friend<br>$F < 1$<br>Friend vs. Stranger<br>$F = 2.30, p = .308$                             | < 1     | 1.118<br>.355      |
| N170          | $F$<br>$p$<br>$\eta p^2$ | 9.17<br>.001<br>.350<br>Partner > Stranger<br>$F = 16.24, p = .003, \eta p^2 = .489$<br>Partner vs. Friend<br>$F = 1.62, p = .660$<br>Friend > Stranger<br>$F = 9.58, p = .020, \eta p^2 = .360$ | < 1     | < 1                |
| P3            | $F$<br>$p$<br>$\eta p^2$ | $F = 13.86$<br>< .001<br>.449<br>Partner > Stranger<br>$F = 44.12, p < .001, \eta p^2 = .722$                                                                                                    | < 1     | 2.21<br>.077       |



|                       |  |                                                                                                                                                                                                      |              |              |
|-----------------------|--|------------------------------------------------------------------------------------------------------------------------------------------------------------------------------------------------------|--------------|--------------|
|                       |  | Partner > Friend<br>$F = 10.67, p = .014, \eta_p^2 = .386$<br>Friend vs. Stranger<br>$F = 1.41, p = .756$                                                                                            |              |              |
| Late Positive Complex |  | 21.60<br>< .001<br>.560<br>Partner > Stranger<br>$F = 52.18, p < .001, \eta_p^2 = .754$<br>Partner > Friend<br>$F = 15.85, p = .003, \eta_p^2 = .482$<br>Friend vs. Stranger<br>$F = 5.84, p = .082$ | 1.38<br>.265 | 1.66<br>.169 |

**Table S3 – ERP component results from unimodal ERP analyses.** Results of repeated-measures ANOVAs with factors Emotion (Fear Happy Neutral) and Identity (Partner Stranger Friend). Huyn-Feldt-corrections were applied to correct for violations of sphericity assumptions. In post-tests, p-values are Bonferroni-corrected. Degrees of freedom: (2,34) for main effects of Identity and Emotion; (1,17) for post-tests, (4,68) for Interactions.

| Rating         |                          | Identity                                                                                                                                                                                                            | Emotion                                                                                                                                                                                                     | Identity x Emotion                                                                                                                                                                                                                                                                                                                                                                                                                                                                                                                                                                                                                                                                                                                               |
|----------------|--------------------------|---------------------------------------------------------------------------------------------------------------------------------------------------------------------------------------------------------------------|-------------------------------------------------------------------------------------------------------------------------------------------------------------------------------------------------------------|--------------------------------------------------------------------------------------------------------------------------------------------------------------------------------------------------------------------------------------------------------------------------------------------------------------------------------------------------------------------------------------------------------------------------------------------------------------------------------------------------------------------------------------------------------------------------------------------------------------------------------------------------------------------------------------------------------------------------------------------------|
| Attractiveness | $F$<br>$p$<br>$\eta_p^2$ | 32.71<br>< .001<br>609<br>Partner > Stranger<br>$F = 50.49, p = .001, \eta_p^2 = .706$<br>Partner > Friend<br>$F = 41.09, p < .001, \eta_p^2 = .662$<br>Friend vs. Stranger<br>$F < 1$                              | < 1                                                                                                                                                                                                         | < 1                                                                                                                                                                                                                                                                                                                                                                                                                                                                                                                                                                                                                                                                                                                                              |
| Valence        | $F$<br>$p$<br>$\eta_p^2$ | 18.43<br>< .001<br>.467<br>Partner > Stranger<br>$F = 29.81, p < .001, \eta_p^2 = .587$<br>Partner > Friend<br>$F = 12.32, p = .006, \eta_p^2 = .370$<br>Friend > Stranger<br>$F = 8.96, p = .021, \eta_p^2 = .299$ | 69.93<br>< .001<br>.769<br>Happy > Neutral<br>$F = 62.43, p < .001, \eta_p^2 = .748$<br>Happy > Fear<br>$F = 107.91, p < .001, \eta_p^2 = .837$<br>Fear < Neutral<br>$F = 15.46, p = .002, \eta_p^2 = .424$ | 7.08<br>< .001<br>.252<br>Emotion in Partner<br>$F = 44.90, p < .001, \eta_p^2 = .681$<br>Happy > Neutral<br>$F = 52.25, p < .001, \eta_p^2 = .713$<br>Happy > Fear<br>$F = 65.41, p < .001, \eta_p^2 = .757$<br>Fear vs. Neutral<br>$F = 2.47, p = .393$<br>Emotion in Friend<br>$F = 59.07, p < .001, \eta_p^2 = .738$<br>Happy > Neutral<br>$F = 69.44, p < .001, \eta_p^2 = .768$<br>Happy > Fear<br>$F = 81.12, p < .001, \eta_p^2 = .794$<br>Fear vs. Neutral<br>$F = 4.07, p = .170$<br>Emotion in Stranger<br>$F = 49.33, p < .001, \eta_p^2 = .701$<br>Happy > Neutral<br>$F = 15.46, p = .002, \eta_p^2 = .424$<br>Happy > Fear<br>$F = 117.60, p < .001, \eta_p^2 = .848$<br>Fear < Neutral<br>$F = 33.58, p < .001, \eta_p^2 = .615$ |
| Arousal        | $F$                      | 23.37                                                                                                                                                                                                               | 14.02                                                                                                                                                                                                       | 4.10                                                                                                                                                                                                                                                                                                                                                                                                                                                                                                                                                                                                                                                                                                                                             |

|  |                                   |                                                                                                                                                                                                                                       |                                                                                                                                                                                                                                                |                                                                                                                                                                                                                                                                                                                                                                                                                                                                                                                                                                                                                                                                                                                          |
|--|-----------------------------------|---------------------------------------------------------------------------------------------------------------------------------------------------------------------------------------------------------------------------------------|------------------------------------------------------------------------------------------------------------------------------------------------------------------------------------------------------------------------------------------------|--------------------------------------------------------------------------------------------------------------------------------------------------------------------------------------------------------------------------------------------------------------------------------------------------------------------------------------------------------------------------------------------------------------------------------------------------------------------------------------------------------------------------------------------------------------------------------------------------------------------------------------------------------------------------------------------------------------------------|
|  | <i>p</i><br><i>η</i> <sup>2</sup> | < .001<br>.527<br>Partner > Stranger<br><i>F</i> = 26.08, <i>p</i> < .001, <i>η</i> <sup>2</sup> = .554<br>Partner > Friend<br><i>F</i> = 27.56, <i>p</i> < .001, <i>η</i> <sup>2</sup> = .568<br>Friend vs. Stranger<br><i>F</i> < 1 | < .001<br>.400<br>Happy > Neutral<br><i>F</i> = 9.92, <i>p</i> = .015, <i>η</i> <sup>2</sup> = .321<br>Happy > Fear<br><i>F</i> = 27.40, <i>p</i> < .001, <i>η</i> <sup>2</sup> = .566<br>Fear vs. Neutral<br><i>F</i> = 4.43, <i>p</i> = .143 | .004<br>.163<br>Emotion in Partner<br><i>F</i> = 15.31, <i>p</i> < .001, <i>η</i> <sup>2</sup> = .422<br>Happy > Neutral<br><i>F</i> = 14.72, <i>p</i> = .003, <i>η</i> <sup>2</sup> = .412<br>Happy > Fear<br><i>F</i> = 32.81, <i>p</i> < .001, <i>η</i> <sup>2</sup> = .610<br>Fear vs. Neutral<br><i>F</i> = 1.61, <i>p</i> = .656<br>Emotion in Friend<br><i>F</i> = 2.11, <i>p</i> = .134<br>Emotion in Stranger<br><i>F</i> = 9.92, <i>p</i> < .001, <i>η</i> <sup>2</sup> = .321<br>Happy vs. Neutral<br><i>F</i> = 3.80, <i>p</i> = .195<br>Happy > Fear<br><i>F</i> = 16.86, <i>p</i> = .002, <i>η</i> <sup>2</sup> = .445<br>Fear < Neutral<br><i>F</i> = 8.30, <i>p</i> = .027, <i>η</i> <sup>2</sup> = .283 |
|--|-----------------------------------|---------------------------------------------------------------------------------------------------------------------------------------------------------------------------------------------------------------------------------------|------------------------------------------------------------------------------------------------------------------------------------------------------------------------------------------------------------------------------------------------|--------------------------------------------------------------------------------------------------------------------------------------------------------------------------------------------------------------------------------------------------------------------------------------------------------------------------------------------------------------------------------------------------------------------------------------------------------------------------------------------------------------------------------------------------------------------------------------------------------------------------------------------------------------------------------------------------------------------------|

**Table S4 – Results of stimulus ratings.** Results of repeated-measures ANOVAs with factors Emotion (Fear Happy Neutral) and Identity (Partner Stranger Friend). Huyn-Feldt-corrections were applied to correct for violations of sphericity assumptions. Degrees of freedom: (2,42) for main effects of Identity and Emotion; (1,21) for post-tests. Interactions: *F*(4,84), post-tests of Emotion within Identity (2,42).
